# Supplementary material for: Reduced predation risk for melanistic pygmy grasshoppers in post-fire environments
Source: PubMed Central journal article supplement (PMC3488671; doi:10.1002/ece3.338), 2012-08-01
Supplement: ece30002-2204-SD1.pdf [file ece30002-2204-SD1.pdf]

488 **Supporting Information – Figure S1**

489 **REDUCED PREDATION RISK FOR MELANISTIC PYGMY GRASSHOPPERS IN**  
 490 **POST-FIRE ENVIRONMENTS**

491 Einat Karpestam<sup>1</sup>, Sami Merilaita<sup>2</sup> and Anders Forsman<sup>1,3</sup>

492 <sup>1</sup> School of Natural Sciences, Linnaeus University, SE-391 82 Kalmar, Sweden

493 <sup>2</sup> Environmental and Marine Biology, Åbo Akademi University, FI-20520 Turku, Finland

494 <sup>3</sup> Corresponding author E-mail: Anders.Forsman@lnu.se

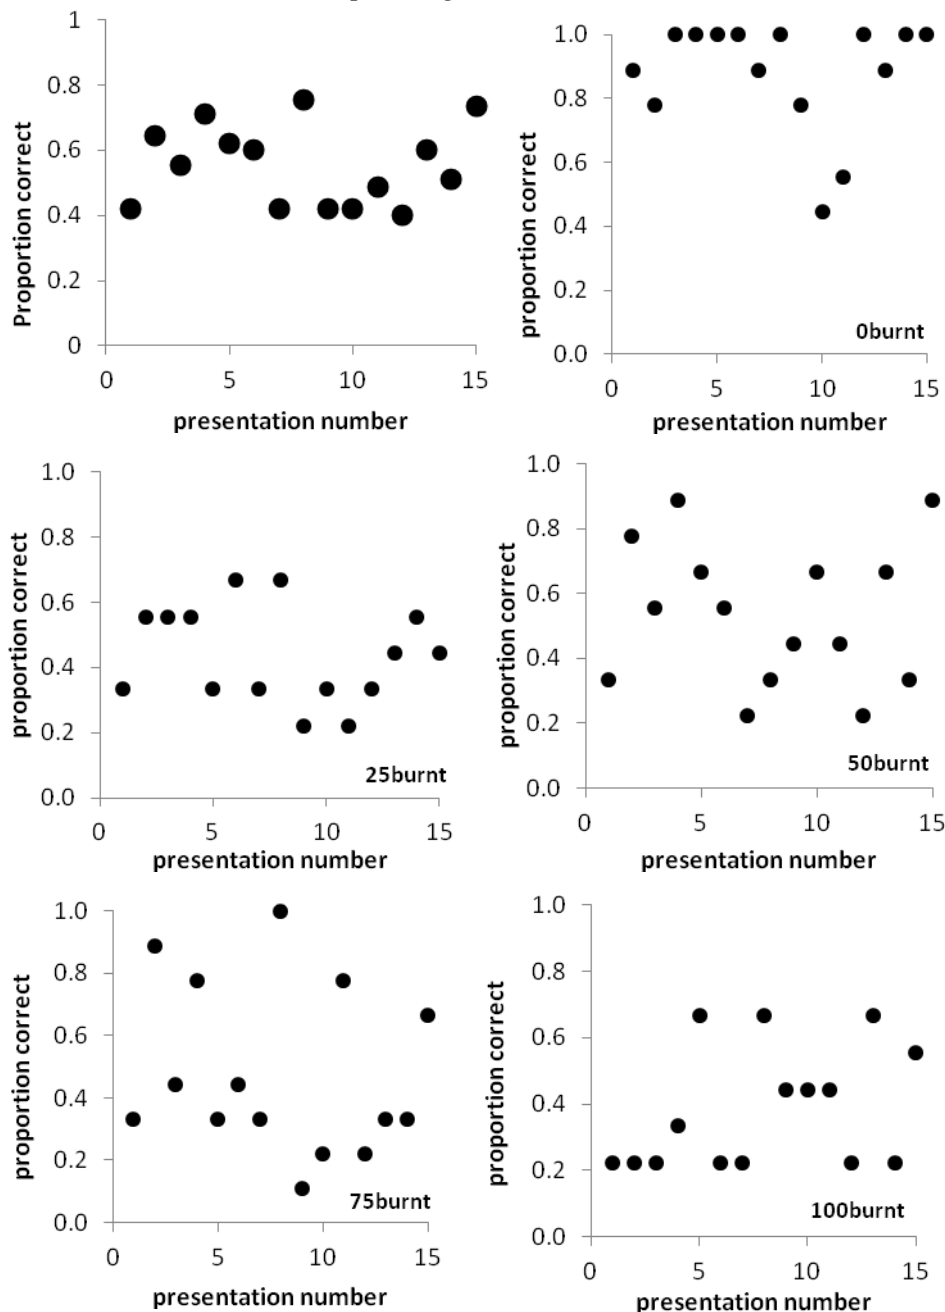

495

496

497

498 **Figure S1.** Proportion of detected grasshopper images as a function of presentation number.  
 499 Mean proportion of presented grasshopper images that were detected computed across human  
 500 predator individuals and backgrounds as a function of presentation number (A). Mean  
 501 proportion of presented grasshopper images that were detected as function of presentation  
 502 number across individuals on each separate background (0, 25, 50, 75, or 100% burnt  
 503 substrate).
